# Supplementary material for: Deep-Sea Bacteria in Crude Oil Biodegradation: A Genomic and Metagenomic Perspective
Source: Research Square preprint supplement (doi:10.21203/rs.3.rs-7431093/v1), 2025-09-02
Supplement: Supplementary file 1 [file 5846768bc608a73193849e75.docx]

**Deep-Sea Bacteria in Crude Oil Biodegradation: A Genomic and Metagenomic Perspective**

*Hafza Shyla a,b Parvathi Ammini a,b Vinod Kumar Nathanc*

1. *Department of Biotechnology, Cochin University of Science and Technology (CUSAT), Kochi, India**
2. *National Institute of Oceanography, Regional centre, Kochi, India*
3. *CSIR-Central Food Technological Research Institute, Mysuru*

**Corresponding author*

*Dr. Parvathi A*

*Professor and Head*

*Department of Biotechnology*

*Cochin University of Science and Technology*

*Kochi-682022, Kerala, India*

*Email: parvathi@cusat.ac.in, parubfsc@gmail.com*

*ORCID id: Parvathi Ammini (0000-0001-6916-2671),*

**Supplementary File**

**Table S1: Sampling location**

| Latitude | Longitude | Station Name. | Depths sampled |
| --- | --- | --- | --- |
| 9.7689 N | 75.541 E | **L1** | 0, 35,180,425,800,1000 |
| 9.804 N | 75.6695 E | **L2** | 0,30,50,100 |
| 9.863 N | 75.8817 E | **L3** | 0,50 |
| 12.3625 N | 73.4676 E | **L4** | 0,36,166,500,750,1000 |
| 12.4085 N | 74.1527 E | **L5** | 0,27,50,100 |
| 12.4628 N | 74.3298 E | **L6** | 0,50 |
| 15.0089 N | 72.4368 E | **L7** | 0,48,100,300,500,750,1000 |
| 15.1035 N | 73.1102 E | **L8** | 0 |
| 15.2002 N | 73.3254 E | **L9** | 0 |
| 18.5464 N | 69.4812 E | **L10** | 0,50,100,200 |
| 18.5445 N | 71.0014 E | **L11** | 0,50,75 |
| 18.5539 N | 72.2083 E | **L12** | 0,50 |

**Table S2: Degradation Summary and Metabolite Formation**

| Component | Initial (%) | Final (%) | % Degraded | Major Product(s) |
| --- | --- | --- | --- | --- |
| PAHs | 45.22 | 1.52 | 96.64 | Acids (e.g., acetic acid, fumaric acid) |
| LCH Alkanes | 22.54 | 5.7 | 74.7 | Fatty acids, esters |
| Phthalates | 21.11 | 0 | 100 | 3,4-dihydroxybenzoate, pyruvate |
| Esters & Acids | 0 | 73.2 | — | Final metabolites |

**
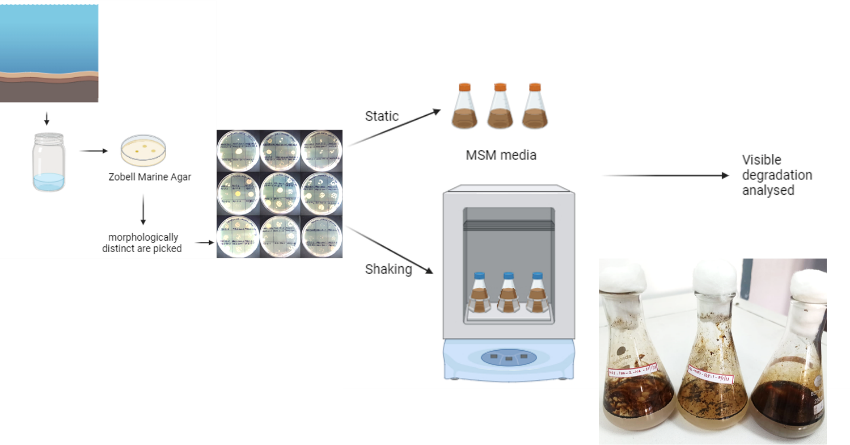
**

**Figure S1:** Primary and secondary screening to isolate potential crude oil degraders

**
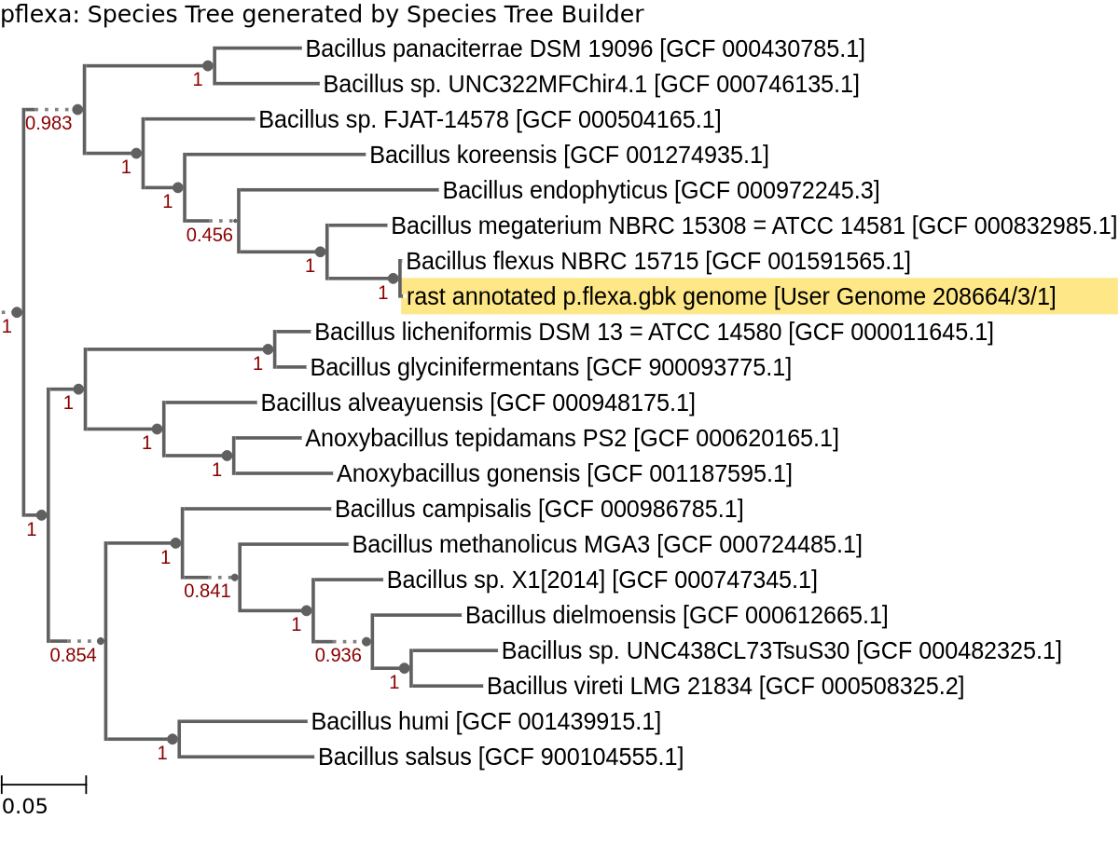
**

**Figure S2:** Phylogenetic tree of *P. flexa MB3165*

**
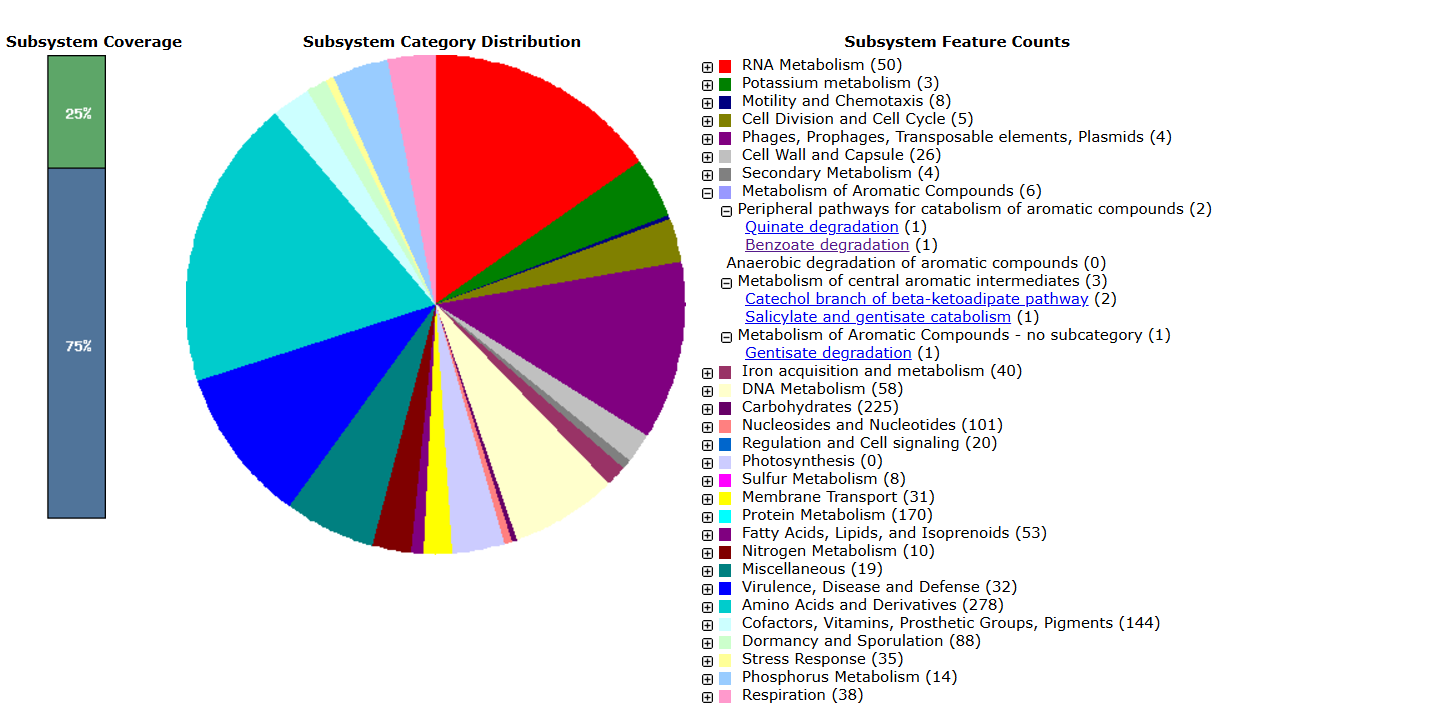
**

**Figure S3**: Functional analysis of *P. flexaMB3165*
